# Supplementary material for: Simulating climate warming scenarios with intentionally biased bootstrapping and its implications for precipitation
Source: Copernicus journal article supplement (doi:10.5194/gmd-2016-188), 2016-08-31
Supplement: Supplementary file 1 [file gmd-2016-188-supplement.pdf]

## Supplement A. Example of intentionally biased bootstrapping (IBB) and block-wise modeling

In the current example, the simulation procedure for monthly precipitation is presented with the IBB temperature for Station 1 (Sokcho) in South Korea instead of weekly due to simplicity. Assume that the monthly precipitation is generated with the condition of  $+0.5^{\circ}\text{C}$  increase. The explained procedure in section 2.4 is applied each month, and the procedure of month 1 is mainly presented as follows.

- (1) The observed monthly temperature and precipitation are obtained as in Table S1 and Table S2, respectively.
- (2) From the observed data, the temperature data are increasingly ordered at each month as shown in Table S3.
- (3) The monthly precipitation data in Table S2 are rearranged in the same order as the ordered temperature data in Table S3 for each month (see Table S4 for the rearranged monthly precipitation). For example,  $-3.4$  is the smallest for month 1 in the first value of the ordered temperature in month 1, 1977 as shown in the second column of Table S3. Subsequently, the monthly precipitation of  $20.2$  in 1977 for month 1 (see Table S2) is arranged for the first value of the rearranged monthly precipitation as shown in the second column of Table S4.
- (4) The weight order ( $r$ ) is estimated with the Harmony Search algorithm to resample the monthly temperature data with a  $+5^{\circ}\text{C}$  increase and the objective function of Eq. (6) at each month. The estimated weight orders are presented below.

|     |      |      |      |      |     |      |      |      |      |      |      |      |
|-----|------|------|------|------|-----|------|------|------|------|------|------|------|
|     | 1    | 2    | 3    | 4    | 5   | 6    | 7    | 8    | 9    | 10   | 11   | 12   |
| $r$ | 0.53 | 0.45 | 0.61 | 0.77 | 0.8 | 0.65 | 0.46 | 0.62 | 1.34 | 0.85 | 0.65 | 0.53 |

(5) With the weight order, the probability that the data are subjected to be selected is

estimated as  $\frac{1}{\Psi_r} S_{i,n}^r$  for  $i=1, \dots, n$ .

In the fourth column of Table S5, the scaled weight  $\frac{1}{\Psi_r} S_{i,n}^r$  is presented. For example,

the first value is estimated as  $(S_{i,n})^r / \Psi_r = (1/33)^{0.53} / 22.106 = 0.159 / 22.106 = 0.007$ . The

scaled weights are accumulated and shown in the fifth column of Table S5.

(6) Using the uniform random number as shown in the sixth column of Table S5, one of the 33 time indices is selected. For example, if the random number is 0.326 as in the first value of the sixth column, then time index 16 is selected because the accumulated scaled weights of the 15<sup>th</sup> and 16<sup>th</sup> orders (see the fifth column of Table S5) are 0.308 and 0.339, respectively. Note that a higher order between the two orders is always selected when the generated uniform random is between two accumulated scaled weights (here, 0.308 and 0.339).

(7) As shown in the eighth column of Table S5, the monthly precipitation of month 1 is sampled with the selected time index shown in the seventh column of Table S5. For example, the 16<sup>th</sup> order of the rearranged precipitation shown in Table S4 is 28.4 mm, and this value is selected for the first value in the eighth column of Table S5, which is the resampled monthly precipitation regarding the condition of the +0.5°C increase in temperature.

(8) Steps (6)-(7) are repeated for all the months as in the sixth, seventh and eight columns of Table S5.

(9) Steps (6)-(8) are repeated until all 100 series are simulated.

Table S1. Observed monthly temperature of station 1 (Sokcho) in South Korea

| Temp | mon1 | mon2 | mon3 | mon4 | mon5 | mon6 | mon7 | mon8 | mon9 | mon10 | mon11 | mon12 |
|------|------|------|------|------|------|------|------|------|------|-------|-------|-------|
| 1976 | -0.5 | 3.1  | 6.0  | 11.5 | 16.8 | 19.1 | 22.1 | 22.3 | 19.1 | 14.7  | 6.5   | 2.3   |
| 1977 | -3.4 | -0.1 | 4.9  | 10.8 | 15.5 | 18.0 | 23.9 | 22.9 | 20.3 | 16.7  | 8.4   | 4.8   |
| 1978 | 0.1  | -0.9 | 5.7  | 12.2 | 17.0 | 20.5 | 24.6 | 25.1 | 20.1 | 14.7  | 9.5   | 4.3   |
| 1979 | 3.2  | 3.6  | 7.2  | 11.1 | 16.4 | 20.2 | 22.8 | 24.2 | 19.5 | 16.5  | 8.4   | 4.7   |
| 1980 | -0.7 | -0.3 | 5.5  | 9.8  | 17.8 | 21.5 | 21.0 | 20.8 | 19.1 | 13.5  | 10.3  | -0.4  |
| 1981 | -2.9 | -0.1 | 4.3  | 11.7 | 14.7 | 17.2 | 23.8 | 23.2 | 18.7 | 14.5  | 5.8   | 3.0   |
| 1982 | -0.9 | 0.7  | 6.0  | 10.9 | 16.4 | 19.7 | 22.9 | 24.2 | 19.9 | 15.9  | 9.1   | 2.6   |
| 1983 | 0.8  | -0.5 | 4.1  | 12.0 | 16.4 | 17.4 | 21.3 | 24.4 | 20.7 | 14.7  | 8.3   | 1.9   |
| 1984 | -2.9 | -1.8 | 3.2  | 7.5  | 14.3 | 20.1 | 22.7 | 25.3 | 19.8 | 14.7  | 10.1  | 1.7   |
| 1985 | -2.4 | 1.7  | 5.0  | 11.2 | 16.0 | 18.7 | 24.7 | 24.7 | 19.9 | 15.4  | 7.4   | 0.1   |
| 1986 | -2.5 | -2.0 | 3.2  | 10.3 | 15.1 | 16.9 | 19.5 | 22.9 | 18.5 | 12.6  | 7.7   | 4.2   |
| 1987 | 0.2  | 1.6  | 4.6  | 11.3 | 17.1 | 20.0 | 23.5 | 22.3 | 18.8 | 15.5  | 8.1   | 3.9   |
| 1988 | 1.1  | -0.4 | 4.6  | 12.7 | 16.9 | 19.5 | 21.3 | 24.4 | 20.1 | 15.8  | 7.9   | 3.5   |
| 1989 | 1.5  | 2.7  | 5.9  | 12.4 | 16.5 | 17.9 | 21.0 | 22.7 | 19.4 | 14.4  | 8.0   | 3.5   |
| 1990 | -1.4 | 2.6  | 6.9  | 10.5 | 16.1 | 19.2 | 21.4 | 24.7 | 19.3 | 15.1  | 11.1  | 3.1   |
| 1991 | -0.6 | 0.0  | 4.1  | 10.7 | 15.3 | 21.0 | 23.3 | 21.7 | 19.9 | 14.4  | 8.6   | 4.0   |
| 1992 | 1.8  | 2.1  | 5.7  | 12.0 | 14.8 | 18.7 | 24.7 | 22.2 | 20.4 | 14.1  | 8.4   | 3.6   |
| 1993 | 0.2  | 2.5  | 5.7  | 11.0 | 15.2 | 17.1 | 19.7 | 21.3 | 20.2 | 14.2  | 9.8   | 2.6   |
| 1994 | 0.5  | 1.7  | 4.6  | 11.8 | 17.2 | 19.4 | 26.8 | 26.0 | 20.8 | 14.8  | 10.0  | 3.7   |
| 1995 | 0.1  | 2.1  | 5.2  | 11.5 | 15.8 | 17.7 | 23.9 | 25.4 | 19.4 | 15.6  | 8.4   | 1.1   |
| 1996 | -0.4 | 0.1  | 4.0  | 11.2 | 14.2 | 18.0 | 22.0 | 23.0 | 20.2 | 14.5  | 7.4   | 3.8   |
| 1997 | -0.4 | 2.0  | 7.0  | 12.7 | 16.2 | 19.8 | 24.2 | 24.7 | 18.4 | 14.3  | 9.5   | 3.0   |
| 1998 | -0.1 | 2.8  | 8.6  | 13.4 | 17.0 | 18.4 | 21.6 | 23.1 | 21.1 | 16.8  | 8.9   | 4.6   |
| 1999 | 1.8  | 3.0  | 5.6  | 11.5 | 17.0 | 20.8 | 23.1 | 23.3 | 21.5 | 14.9  | 9.3   | 3.1   |
| 2000 | -0.4 | -0.1 | 6.8  | 11.2 | 14.2 | 19.2 | 24.8 | 24.0 | 18.6 | 14.4  | 7.7   | 3.2   |
| 2001 | -2.3 | 1.2  | 5.6  | 12.2 | 17.3 | 20.1 | 23.4 | 22.4 | 19.9 | 15.9  | 8.7   | 1.4   |
| 2002 | 0.8  | 4.2  | 8.6  | 12.2 | 15.6 | 19.5 | 21.8 | 22.7 | 19.1 | 13.0  | 5.1   | 1.2   |
| 2003 | -1.6 | 1.6  | 4.5  | 11.0 | 14.8 | 20.3 | 20.8 | 22.5 | 19.6 | 14.1  | 9.3   | 2.9   |
| 2004 | 0.5  | 3.6  | 6.9  | 12.7 | 16.6 | 20.8 | 23.8 | 23.1 | 20.1 | 14.8  | 10.6  | 4.2   |
| 2005 | -0.1 | -0.8 | 4.2  | 12.8 | 14.4 | 20.6 | 24.1 | 25.0 | 19.9 | 15.0  | 9.8   | -1.5  |
| 2006 | 0.3  | 1.5  | 5.9  | 9.5  | 14.4 | 18.3 | 21.0 | 25.2 | 19.1 | 17.1  | 8.5   | 2.0   |
| 2007 | 0.8  | 4.1  | 6.6  | 11.7 | 17.1 | 20.3 | 22.0 | 25.0 | 20.6 | 15.2  | 8.4   | 3.5   |
| 2008 | 0.3  | 1.2  | 7.3  | 13.1 | 16.8 | 18.7 | 25.3 | 23.4 | 20.6 | 16.8  | 9.0   | 3.6   |

Table S2. Observed monthly precipitation of station 1 (Sokcho) in South Korea

| Precip | 1     | 2     | 3     | 4     | 5     | 6     | 7     | 8     | 9     | 10    | 11    | 12    |
|--------|-------|-------|-------|-------|-------|-------|-------|-------|-------|-------|-------|-------|
| 1976   | 0.1   | 208.3 | 43.7  | 52.6  | 10.3  | 76.2  | 89.1  | 602.7 | 68.3  | 67.2  | 45.1  | 102.6 |
| 1977   | 20.2  | 25.0  | 55.7  | 238.3 | 33.2  | 68.0  | 174.7 | 100.3 | 120.8 | 67.1  | 159.1 | 49.6  |
| 1978   | 112.9 | 81.4  | 85.2  | 32.2  | 22.5  | 266.9 | 172.1 | 232.5 | 99.4  | 284.3 | 54.1  | 158.8 |
| 1979   | 142.3 | 58.7  | 88.2  | 126.0 | 117.0 | 289.1 | 181.0 | 206.0 | 43.9  | 52.3  | 0.0   | 8.6   |
| 1980   | 43.0  | 6.0   | 89.8  | 147.7 | 22.9  | 79.4  | 271.3 | 208.3 | 114.0 | 16.3  | 8.5   | 15.3  |
| 1981   | 16.8  | 18.1  | 63.6  | 81.4  | 151.7 | 74.7  | 333.5 | 177.8 | 405.7 | 10.3  | 81.2  | 1.5   |
| 1982   | 45.9  | 48.2  | 39.8  | 45.7  | 137.8 | 44.2  | 163.1 | 392.9 | 6.9   | 23.3  | 146.7 | 5.5   |
| 1983   | 19.6  | 9.7   | 85.4  | 62.2  | 33.9  | 125.7 | 300.4 | 246.3 | 148.6 | 111.8 | 21.9  | 31.0  |
| 1984   | 18.3  | 31.5  | 6.8   | 85.1  | 68.2  | 96.7  | 289.9 | 371.8 | 650.8 | 6.7   | 73.0  | 42.9  |
| 1985   | 1.6   | 38.7  | 42.6  | 62.5  | 162.0 | 54.3  | 60.3  | 293.7 | 180.7 | 216.7 | 39.2  | 31.8  |
| 1986   | 58.3  | 25.4  | 28.6  | 60.4  | 23.1  | 110.5 | 180.7 | 474.6 | 188.0 | 169.2 | 10.8  | 49.0  |
| 1987   | 14.4  | 95.0  | 63.5  | 48.5  | 95.3  | 123.9 | 207.3 | 383.8 | 55.9  | 63.5  | 130.9 | 8.9   |
| 1988   | 4.5   | 52.7  | 38.0  | 14.7  | 50.9  | 75.6  | 202.1 | 84.2  | 308.5 | 56.2  | 39.8  | 0.7   |
| 1989   | 165.9 | 65.3  | 121.7 | 6.2   | 66.8  | 109.9 | 221.2 | 277.7 | 156.4 | 163.0 | 123.0 | 103.0 |
| 1990   | 81.9  | 170.6 | 86.8  | 120.4 | 79.8  | 236.6 | 262.8 | 110.5 | 596.4 | 90.6  | 143.6 | 31.7  |
| 1991   | 18.2  | 25.3  | 48.6  | 36.7  | 77.5  | 15.2  | 250.7 | 148.2 | 129.4 | 18.4  | 14.6  | 225.9 |
| 1992   | 86.1  | 45.2  | 75.6  | 108.7 | 130.9 | 63.3  | 161.0 | 403.7 | 256.3 | 122.2 | 38.2  | 65.2  |
| 1993   | 79.0  | 89.4  | 37.7  | 95.8  | 111.3 | 192.3 | 286.1 | 329.4 | 46.4  | 16.0  | 106.4 | 15.5  |
| 1994   | 71.7  | 43.4  | 4.2   | 25.3  | 94.8  | 69.3  | 86.6  | 236.9 | 37.8  | 280.1 | 143.2 | 15.9  |
| 1995   | 11.0  | 45.0  | 110.4 | 27.3  | 18.1  | 107.0 | 176.6 | 441.7 | 142.7 | 6.4   | 8.8   | 2.5   |
| 1996   | 23.5  | 114.2 | 75.1  | 64.9  | 20.2  | 356.5 | 189.4 | 200.0 | 42.0  | 77.7  | 66.0  | 20.1  |
| 1997   | 59.9  | 34.4  | 43.6  | 45.4  | 355.6 | 113.0 | 73.3  | 60.3  | 322.4 | 39.7  | 153.9 | 101.0 |
| 1998   | 47.6  | 69.0  | 12.6  | 101.2 | 67.2  | 199.0 | 550.6 | 376.5 | 175.0 | 81.9  | 65.6  | 51.5  |
| 1999   | 1.1   | 4.2   | 55.8  | 158.5 | 167.6 | 78.8  | 152.1 | 515.2 | 431.4 | 76.6  | 78.3  | 2.4   |
| 2000   | 90.2  | 8.4   | 8.7   | 23.4  | 71.0  | 175.7 | 109.2 | 440.3 | 347.2 | 7.0   | 58.3  | 5.8   |
| 2001   | 37.6  | 64.4  | 24.0  | 14.1  | 7.2   | 126.6 | 233.3 | 56.9  | 311.5 | 234.9 | 36.7  | 20.2  |
| 2002   | 87.1  | 0.6   | 14.1  | 58.5  | 78.2  | 66.5  | 301.4 | 531.1 | 226.0 | 42.8  | 4.0   | 140.0 |
| 2003   | 34.7  | 63.0  | 56.8  | 136.1 | 113.0 | 132.1 | 258.0 | 349.2 | 425.4 | 51.6  | 278.2 | 1.8   |
| 2004   | 25.0  | 26.7  | 1.8   | 104.4 | 46.7  | 99.7  | 554.0 | 460.3 | 200.1 | 16.9  | 39.5  | 12.2  |
| 2005   | 28.4  | 52.4  | 102.5 | 47.9  | 122.7 | 151.2 | 185.2 | 246.9 | 263.9 | 114.9 | 38.4  | 0.4   |
| 2006   | 34.5  | 18.3  | 9.3   | 90.2  | 141.7 | 129.0 | 545.0 | 109.3 | 112.4 | 285.5 | 84.0  | 47.4  |
| 2007   | 23.3  | 7.2   | 112.6 | 27.4  | 102.1 | 52.3  | 212.8 | 206.8 | 397.8 | 87.3  | 33.9  | 1.2   |
| 2008   | 66.6  | 0.6   | 103.9 | 13.5  | 70.0  | 91.3  | 361.6 | 343.1 | 129.9 | 73.5  | 78.5  | 78.0  |

Table S3. Increasingly ordered monthly temperature of Station 1 (Sokcho) in South Korea

| Mon /Ord. | 1    | 2    | 3    | 4    | 5    | 6    | 7    | 8    | 9    | 10   | 11   | 12   |
|-----------|------|------|------|------|------|------|------|------|------|------|------|------|
| 1         | -3.4 | -2   | 3.22 | 7.48 | 14.2 | 16.9 | 19.5 | 20.8 | 18.4 | 12.6 | 5.07 | -1.5 |
| 2         | -2.9 | -1.8 | 3.23 | 9.53 | 14.2 | 17.1 | 19.7 | 21.3 | 18.5 | 13   | 5.83 | -0.4 |
| 3         | -2.9 | -0.9 | 3.97 | 9.83 | 14.3 | 17.2 | 20.8 | 21.7 | 18.6 | 13.5 | 6.52 | 0.08 |
| 4         | -2.5 | -0.8 | 4.09 | 10.3 | 14.4 | 17.4 | 21   | 22.2 | 18.7 | 14.1 | 7.38 | 1.07 |
| 5         | -2.4 | -0.5 | 4.15 | 10.5 | 14.4 | 17.7 | 21   | 22.3 | 18.8 | 14.1 | 7.4  | 1.17 |
| 6         | -2.3 | -0.4 | 4.18 | 10.7 | 14.7 | 17.9 | 21   | 22.3 | 19.1 | 14.2 | 7.72 | 1.39 |
| 7         | -1.6 | -0.3 | 4.25 | 10.8 | 14.8 | 18.0 | 21.3 | 22.4 | 19.1 | 14.3 | 7.73 | 1.71 |
| 8         | -1.4 | -0.1 | 4.53 | 10.9 | 14.8 | 18.0 | 21.3 | 22.5 | 19.1 | 14.4 | 7.94 | 1.94 |
| 9         | -0.9 | -0.1 | 4.62 | 11   | 15.1 | 18.3 | 21.4 | 22.7 | 19.1 | 14.4 | 8.04 | 2.01 |
| 10        | -0.7 | -0.1 | 4.62 | 11   | 15.2 | 18.4 | 21.6 | 22.7 | 19.3 | 14.4 | 8.14 | 2.25 |
| 11        | -0.6 | 0.03 | 4.63 | 11.1 | 15.3 | 18.7 | 21.8 | 22.9 | 19.4 | 14.5 | 8.31 | 2.59 |
| 12        | -0.5 | 0.1  | 4.92 | 11.2 | 15.5 | 18.7 | 22.0 | 22.9 | 19.4 | 14.5 | 8.36 | 2.61 |
| 13        | -0.4 | 0.73 | 5.0  | 11.2 | 15.6 | 18.7 | 22.0 | 23.0 | 19.5 | 14.7 | 8.36 | 2.92 |
| 14        | -0.4 | 1.2  | 5.23 | 11.2 | 15.8 | 19.1 | 22.1 | 23.1 | 19.6 | 14.7 | 8.42 | 2.97 |
| 15        | -0.4 | 1.22 | 5.53 | 11.3 | 16   | 19.2 | 22.7 | 23.1 | 19.8 | 14.7 | 8.44 | 2.99 |
| 16        | -0.1 | 1.48 | 5.57 | 11.5 | 16.1 | 19.2 | 22.8 | 23.2 | 19.9 | 14.7 | 8.44 | 3.09 |
| 17        | -0.1 | 1.58 | 5.62 | 11.5 | 16.2 | 19.4 | 22.9 | 23.3 | 19.9 | 14.8 | 8.5  | 3.1  |
| 18        | 0.09 | 1.64 | 5.66 | 11.5 | 16.4 | 19.5 | 23.1 | 23.4 | 19.9 | 14.8 | 8.59 | 3.25 |
| 19        | 0.1  | 1.68 | 5.68 | 11.7 | 16.4 | 19.5 | 23.3 | 24.0 | 19.9 | 14.9 | 8.72 | 3.5  |
| 20        | 0.17 | 1.75 | 5.72 | 11.7 | 16.4 | 19.7 | 23.4 | 24.2 | 19.9 | 15.0 | 8.91 | 3.51 |
| 21        | 0.23 | 2.04 | 5.87 | 11.8 | 16.5 | 19.8 | 23.5 | 24.2 | 20.1 | 15.1 | 9.04 | 3.54 |
| 22        | 0.28 | 2.14 | 5.94 | 12.0 | 16.6 | 20.0 | 23.8 | 24.4 | 20.1 | 15.2 | 9.13 | 3.56 |
| 23        | 0.31 | 2.14 | 6.02 | 12.0 | 16.8 | 20.1 | 23.8 | 24.4 | 20.1 | 15.4 | 9.26 | 3.6  |
| 24        | 0.46 | 2.54 | 6.05 | 12.2 | 16.8 | 20.1 | 23.9 | 24.7 | 20.2 | 15.5 | 9.3  | 3.67 |
| 25        | 0.5  | 2.56 | 6.57 | 12.2 | 16.9 | 20.2 | 23.9 | 24.7 | 20.2 | 15.6 | 9.48 | 3.81 |
| 26        | 0.76 | 2.74 | 6.84 | 12.2 | 17.0 | 20.3 | 24.1 | 24.7 | 20.3 | 15.8 | 9.48 | 3.87 |
| 27        | 0.8  | 2.76 | 6.86 | 12.4 | 17.0 | 20.3 | 24.2 | 25.0 | 20.4 | 15.9 | 9.78 | 3.99 |
| 28        | 0.85 | 3.03 | 6.89 | 12.7 | 17.0 | 20.5 | 24.6 | 25.0 | 20.6 | 15.9 | 9.8  | 4.2  |
| 29        | 1.14 | 3.08 | 7.01 | 12.7 | 17.1 | 20.6 | 24.7 | 25.1 | 20.6 | 16.5 | 10.0 | 4.23 |
| 30        | 1.48 | 3.56 | 7.23 | 12.7 | 17.1 | 20.8 | 24.7 | 25.2 | 20.7 | 16.7 | 10.1 | 4.33 |
| 31        | 1.79 | 3.57 | 7.26 | 12.8 | 17.2 | 20.8 | 24.8 | 25.3 | 20.8 | 16.8 | 10.3 | 4.6  |
| 32        | 1.8  | 4.06 | 8.55 | 13.1 | 17.3 | 21.0 | 25.3 | 25.4 | 21.1 | 16.8 | 10.6 | 4.7  |
| 33        | 3.21 | 4.18 | 8.59 | 13.4 | 17.8 | 21.5 | 26.8 | 26.0 | 21.5 | 17.1 | 11.1 | 4.84 |

Table S4. Rearranged monthly precipitation with the same order of the temperature data in Table S3 of Station 1 (Sokcho) in South Korea

| Mon /Ord. | 1     | 2     | 3     | 4     | 5     | 6     | 7     | 8     | 9     | 10    | 11    | 12    |
|-----------|-------|-------|-------|-------|-------|-------|-------|-------|-------|-------|-------|-------|
| 1         | 20.2  | 25.4  | 6.8   | 85.1  | 20.2  | 110.5 | 180.7 | 208.3 | 322.4 | 169.2 | 4.0   | 0.4   |
| 2         | 18.3  | 31.5  | 28.6  | 90.2  | 71.0  | 192.3 | 286.1 | 329.4 | 188.0 | 42.8  | 81.2  | 15.3  |
| 3         | 16.8  | 81.4  | 75.1  | 147.7 | 68.2  | 74.7  | 258.0 | 148.2 | 347.2 | 16.3  | 45.1  | 31.8  |
| 4         | 58.3  | 52.4  | 48.6  | 60.4  | 122.7 | 125.7 | 271.3 | 403.7 | 405.7 | 51.6  | 39.2  | 2.5   |
| 5         | 1.6   | 9.7   | 85.4  | 120.4 | 141.7 | 107.0 | 221.2 | 383.8 | 55.9  | 122.2 | 66.0  | 140.0 |
| 6         | 37.6  | 52.7  | 102.5 | 36.7  | 151.7 | 109.9 | 545.0 | 602.7 | 112.4 | 16.0  | 10.8  | 20.2  |
| 7         | 34.7  | 6.0   | 63.6  | 238.3 | 113.0 | 356.5 | 202.1 | 56.9  | 226.0 | 39.7  | 58.3  | 42.9  |
| 8         | 81.9  | 25.0  | 56.8  | 45.7  | 130.9 | 68.0  | 300.4 | 349.2 | 68.3  | 7.0   | 39.8  | 31.0  |
| 9         | 45.9  | 8.4   | 4.2   | 136.1 | 23.1  | 129.0 | 262.8 | 277.7 | 114.0 | 18.4  | 123.0 | 47.4  |
| 10        | 43.0  | 18.1  | 38.0  | 95.8  | 111.3 | 199.0 | 550.6 | 531.1 | 596.4 | 163.0 | 130.9 | 102.6 |
| 11        | 18.2  | 25.3  | 63.5  | 126.0 | 77.5  | 54.3  | 301.4 | 474.6 | 156.4 | 77.7  | 21.9  | 5.5   |
| 12        | 0.1   | 114.2 | 55.7  | 62.5  | 33.2  | 63.3  | 189.4 | 100.3 | 142.7 | 10.3  | 0.0   | 15.5  |
| 13        | 23.5  | 48.2  | 42.6  | 64.9  | 78.2  | 91.3  | 212.8 | 200.0 | 43.9  | 6.7   | 8.8   | 1.8   |
| 14        | 90.2  | 64.4  | 110.4 | 23.4  | 18.1  | 76.2  | 89.1  | 376.5 | 425.4 | 284.3 | 33.9  | 1.5   |
| 15        | 59.9  | 0.6   | 89.8  | 48.5  | 162.0 | 175.7 | 289.9 | 460.3 | 650.8 | 111.8 | 38.2  | 101.0 |
| 16        | 28.4  | 18.3  | 24.0  | 158.5 | 79.8  | 236.6 | 181.0 | 177.8 | 6.9   | 67.2  | 159.1 | 31.7  |
| 17        | 47.6  | 63.0  | 55.8  | 52.6  | 355.6 | 69.3  | 163.1 | 515.2 | 180.7 | 280.1 | 84.0  | 2.4   |
| 18        | 112.9 | 95.0  | 85.2  | 27.3  | 33.9  | 75.6  | 152.1 | 343.1 | 129.4 | 16.9  | 14.6  | 5.8   |
| 19        | 11.0  | 38.7  | 75.6  | 81.4  | 117.0 | 66.5  | 250.7 | 440.3 | 311.5 | 76.6  | 36.7  | 0.7   |
| 20        | 79.0  | 43.4  | 37.7  | 27.4  | 137.8 | 44.2  | 233.3 | 392.9 | 263.9 | 114.9 | 65.6  | 1.2   |
| 21        | 14.4  | 34.4  | 121.7 | 25.3  | 66.8  | 113.0 | 207.3 | 206.0 | 308.5 | 90.6  | 78.5  | 103.0 |
| 22        | 66.6  | 45.2  | 9.3   | 108.7 | 46.7  | 123.9 | 333.5 | 84.2  | 200.1 | 87.3  | 146.7 | 65.2  |
| 23        | 34.5  | 45.0  | 43.7  | 62.2  | 70.0  | 126.6 | 554.0 | 246.3 | 99.4  | 216.7 | 278.2 | 78.0  |
| 24        | 71.7  | 89.4  | 39.8  | 32.2  | 10.3  | 96.7  | 174.7 | 60.3  | 46.4  | 63.5  | 78.3  | 15.9  |
| 25        | 25.0  | 170.6 | 112.6 | 58.5  | 50.9  | 289.1 | 176.6 | 110.5 | 42.0  | 6.4   | 54.1  | 20.1  |
| 26        | 23.3  | 65.3  | 8.7   | 14.1  | 22.5  | 132.1 | 185.2 | 293.7 | 120.8 | 56.2  | 153.9 | 8.9   |
| 27        | 87.1  | 69.0  | 1.8   | 6.2   | 67.2  | 52.3  | 73.3  | 206.8 | 256.3 | 23.3  | 106.4 | 225.9 |
| 28        | 19.6  | 4.2   | 86.8  | 45.4  | 167.6 | 266.9 | 172.1 | 246.9 | 129.9 | 234.9 | 38.4  | 49.0  |
| 29        | 4.5   | 208.3 | 43.6  | 104.4 | 95.3  | 151.2 | 161.0 | 232.5 | 397.8 | 52.3  | 143.2 | 12.2  |
| 30        | 165.9 | 58.7  | 88.2  | 14.7  | 102.1 | 78.8  | 60.3  | 109.3 | 148.6 | 67.1  | 73.0  | 158.8 |
| 31        | 86.1  | 26.7  | 103.9 | 47.9  | 94.8  | 99.7  | 109.2 | 371.8 | 37.8  | 73.5  | 8.5   | 51.5  |
| 32        | 1.1   | 7.2   | 12.6  | 13.5  | 7.2   | 15.2  | 361.6 | 441.7 | 175.0 | 81.9  | 39.5  | 8.6   |
| 33        | 142.3 | 0.6   | 14.1  | 101.2 | 22.9  | 79.4  | 86.6  | 236.9 | 431.4 | 285.5 | 143.6 | 49.6  |

Table S5. Estimated selection probability for IBB and its related information for resampling monthly precipitation in month 1 of Station 1 (Sokcho) in South Korea. Here,  $r=0.53$ .

| i  | $S_{i,n}$           | $(S_{i,n})^r$ | $(S_{i,n})^r/\Psi_r$ | Acc.<br>$(S_{i,n})^r/\Psi_r$ | RAND<br># | Sel.<br>Index | Sel.<br>Precip |
|----|---------------------|---------------|----------------------|------------------------------|-----------|---------------|----------------|
| 1  | 0.030               | 0.159         | 0.007                | 0.007                        | 0.326     | 16            | 28.4           |
| 2  | 0.061               | 0.229         | 0.010                | 0.018                        | 0.231     | 13            | 23.5           |
| 3  | 0.091               | 0.284         | 0.013                | 0.030                        | 0.627     | 25            | 25.0           |
| 4  | 0.121               | 0.330         | 0.015                | 0.045                        | 0.330     | 16            | 28.4           |
| 5  | 0.152               | 0.371         | 0.017                | 0.062                        | 0.379     | 18            | 112.9          |
| 6  | 0.182               | 0.408         | 0.018                | 0.081                        | 0.705     | 27            | 87.1           |
| 7  | 0.212               | 0.443         | 0.020                | 0.101                        | 0.624     | 25            | 25.0           |
| 8  | 0.242               | 0.475         | 0.021                | 0.122                        | 0.543     | 22            | 66.6           |
| 9  | 0.273               | 0.505         | 0.023                | 0.145                        | 0.606     | 24            | 71.7           |
| 10 | 0.303               | 0.534         | 0.024                | 0.169                        | 0.690     | 26            | 23.3           |
| 11 | 0.333               | 0.562         | 0.025                | 0.195                        | 0.860     | 30            | 165.9          |
| 12 | 0.364               | 0.588         | 0.027                | 0.221                        | 0.927     | 32            | 1.1            |
| 13 | 0.394               | 0.613         | 0.028                | 0.249                        | 0.370     | 17            | 47.6           |
| 14 | 0.424               | 0.637         | 0.029                | 0.278                        | 0.386     | 18            | 112.9          |
| 15 | 0.455               | 0.661         | 0.030                | 0.308                        | 0.142     | 9             | 45.9           |
| 16 | 0.485               | 0.684         | 0.031                | 0.339                        | 0.894     | 31            | 86.1           |
| 17 | 0.515               | 0.706         | 0.032                | 0.371                        | 0.345     | 17            | 47.6           |
| 18 | 0.545               | 0.727         | 0.033                | 0.403                        | 0.314     | 16            | 28.4           |
| 19 | 0.576               | 0.748         | 0.034                | 0.437                        | 0.891     | 31            | 86.1           |
| 20 | 0.606               | 0.769         | 0.035                | 0.472                        | 0.829     | 30            | 165.9          |
| 21 | 0.636               | 0.789         | 0.036                | 0.508                        | 0.519     | 22            | 66.6           |
| 22 | 0.667               | 0.808         | 0.037                | 0.544                        | 0.020     | 3             | 16.8           |
| 23 | 0.697               | 0.827         | 0.037                | 0.582                        | 0.155     | 10            | 43.0           |
| 24 | 0.727               | 0.846         | 0.038                | 0.620                        | 0.613     | 24            | 41.7           |
| 25 | 0.758               | 0.864         | 0.039                | 0.659                        | 0.832     | 30            | 165.9          |
| 26 | 0.788               | 0.882         | 0.040                | 0.699                        | 0.111     | 8             | 81.9           |
| 27 | 0.818               | 0.900         | 0.041                | 0.740                        | 0.178     | 11            | 18.2           |
| 28 | 0.848               | 0.917         | 0.041                | 0.781                        | 0.788     | 29            | 4.5            |
| 29 | 0.879               | 0.934         | 0.042                | 0.823                        | 0.456     | 20            | 79             |
| 30 | 0.909               | 0.951         | 0.043                | 0.866                        | 0.878     | 31            | 86.1           |
| 31 | 0.939               | 0.968         | 0.044                | 0.910                        | 0.820     | 29            | 4.5            |
| 32 | 0.970               | 0.984         | 0.045                | 0.955                        | 0.957     | 33            | 142.3          |
| 33 | 1.000               | 1.000         | 0.045                | 1.00                         | 0.037     | 4             | 58.3           |
|    | Sum<br>( $\Psi_r$ ) | 22.106        |                      |                              |           |               |                |

Remark: (1) The first column presents the order of the 33 years.

(2) The second column is  $S_{i,n}=i/n$ , e.g.,  $i/n=1/33=0.3$  for the first value.

(3) The third column is  $(S_{i,n})^r=(i/n)^r$ , e.g.,  $(i/n)^{0.53}=(1/33)^{0.53}=0.159$  for the first value.

(4) The fourth column presents the scaled weight  $(S_{i,n})^r/\Psi_r=(i/n)^r/\sum((i/n)^r)$ , e.g.,

$(S_{i,n})^r/\Psi_r=0.159/22.106=0.007$  for the first value.

(5) The fifth column presents the accumulation of the scaled weight. Note that the last value (i.e., 33<sup>rd</sup>) must be 1.0 because it is the accumulated probability, similar to the discrete cumulative distribution function (CDF).

(6) The sixth column presents a generated uniform random number between 0 and 1,  $U\sim\text{Unif}[0,1]$  for  $i=1,\dots,33$ . Note that in this case, the simulation length is equal to the recorded length.

(7) The seventh column shows the selected time index using the generated uniform random number and the accumulated scaled weights in the fifth column. For example, if the random number is 0.326 as in the first value of the sixth column, then time index 16 is selected because the 15<sup>th</sup> and 16<sup>th</sup> accumulated scaled weights are 0.308 and 0.339, respectively. Note that the higher time index 16 is selected with this procedure.

(8) The eighth column shows the selected monthly precipitation of month 1 with the selected time index shown in the seventh column. For example, the 16<sup>th</sup> order of the rearranged precipitation shown in Table S4 is 28.4 mm and is selected for the first value of the simulated value in the eighth column.
