# Supplementary material for: Simulating climate warming scenarios with intentionally biased bootstrapping and its implications for precipitation
Source: Copernicus journal article supplement (doi:10.5194/gmd-2016-188), 2016-08-31
Supplement: Supplementary file [file gmd-2016-188-AC1-supplement.pdf]

Author response to the reviews of the paper “Simulating warming climate scenarios with intentionally biased bootstrapping and its implications for precipitation”

(Manuscript # gmd-2016-188)

Taesam Lee

Line 53. White space missing

*Reply: The space is added accordingly.*

Line 58 Clausis-Clapeyron -> Clausius Clapeyron

*Reply: The word has been modified accordingly as Clausius-Clapeyron. Note that the author do not remove ‘-’ mark between two name because this relation has been popularly employed as is.*

Line 152  $\text{Sigma}^2 = E(X^2) - (EX)^2$

Shouldn't it be  $\text{Sigma}^2 = E(X^2) - E(X)^2$  ? Please check

*Reply: The author checked the equation once again and found no error in the equation. It is right with  $E(X^2)$ .*

Figure 3 legend caption. What are the red crosses? Please explain how are defined the boxes, the whiskers, the line in the boxes.

*Reply: The caption has been modified accordingly with adding the sentence as below:  
“Boxes indicate the interquartile range (IQR), and whiskers extend to  $\pm 1.5IQR$ . The horizontal lines inside the boxes depict the median of the data. Data beyond the fences ( $\pm 1.5IQR$ ) are indicated by a plus symbol (+), which represent outliers.”*

Figure 4 legend caption. Please explain how are defined the boxes, the whiskers, the line in the boxes.

*Reply: The caption has been modified accordingly with adding the sentence as below:  
“Boxes indicate the interquartile range (IQR), and whiskers extend to  $\pm 1.5IQR$ . The horizontal lines inside the boxes depict the median of the data. Data beyond the fences ( $\pm 1.5IQR$ ) are indicated by a plus symbol (+), which represent outliers.”*

---
